# Supplementary material
Source: PubMed Central journal article supplement (PMC4879875)
Supplement: NIHMS788087-supplement-Supporting_Information.pdf [file NIHMS788087-supplement-Supporting_Information.pdf]

**Supporting Information**

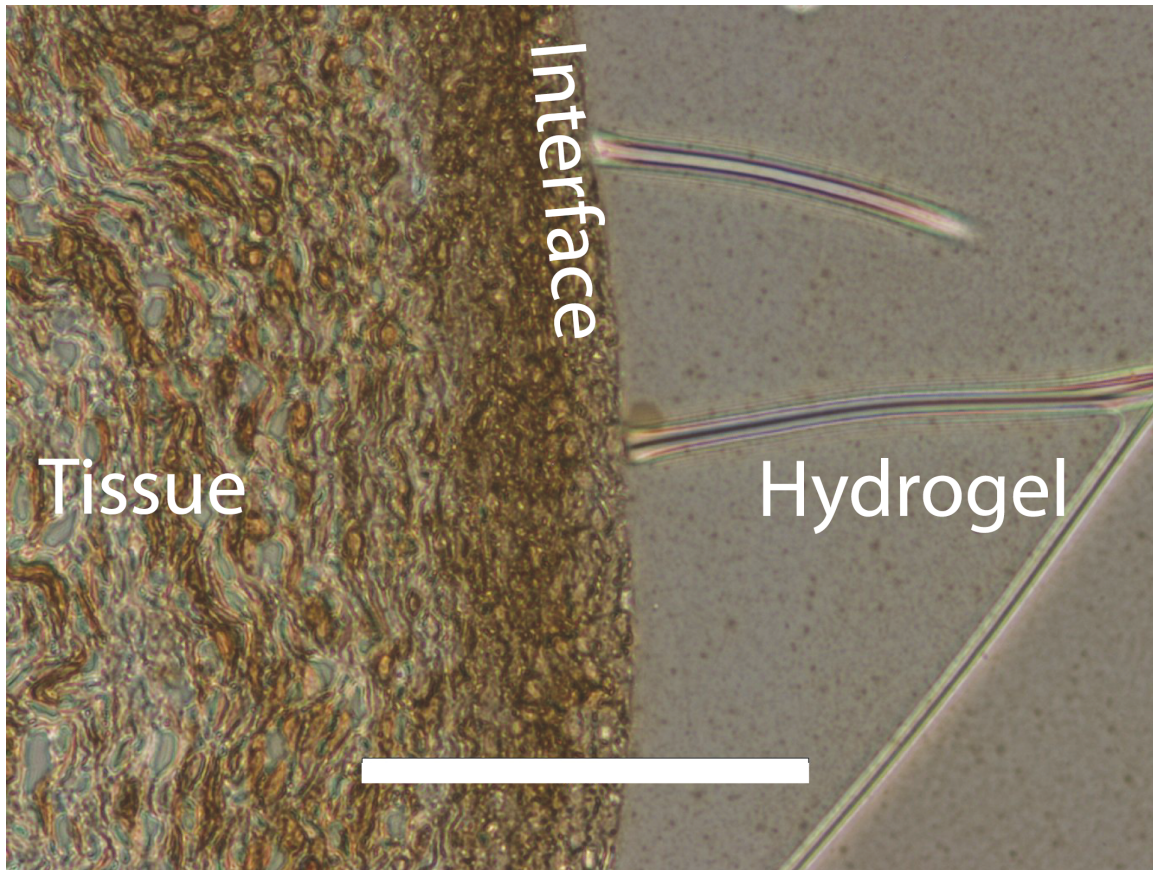

**Figure S1: High magnification (40x) image of the tissue-hydrogel interface, highlighting the difficulty in counting individual cells. Scale bar is 200 $\mu$ m.**

*Macrophages in the foreign body response*

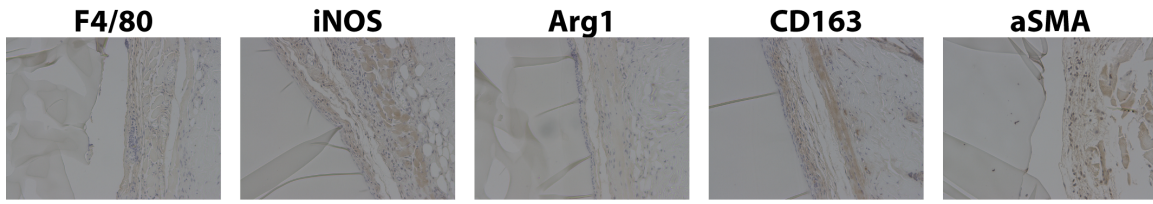

**Figure S2: Isotype controls for each antibody.**

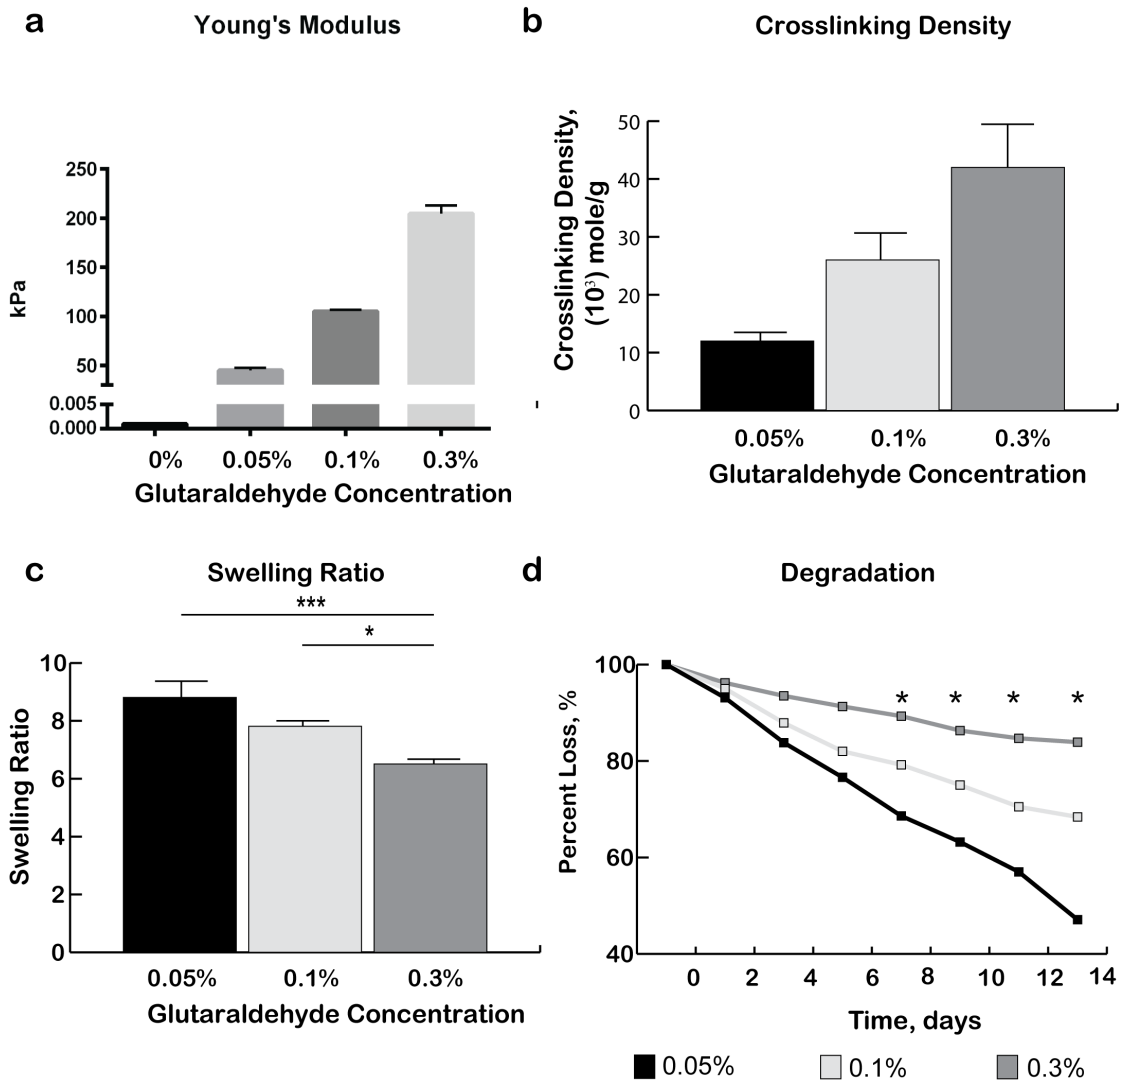

**Figure S3: Properties of crosslinked hydrogels. A. Young's modulus determined in unconfined compression. All groups are statistically significant from one another (one way ANOVA,  $p < 0.05$ ). B. Crosslinking density, determined from equilibrium swelling theory. All groups are statistically significant from one another (one way ANOVA,  $p < 0.05$ ). C. Equilibrium swelling ratio. D. Change in mass over time, normalized to starting mass. \* denotes statistical significance from all other groups at indicated time point ( $p < 0.05$ , one way ANOVA performed at each time point).**

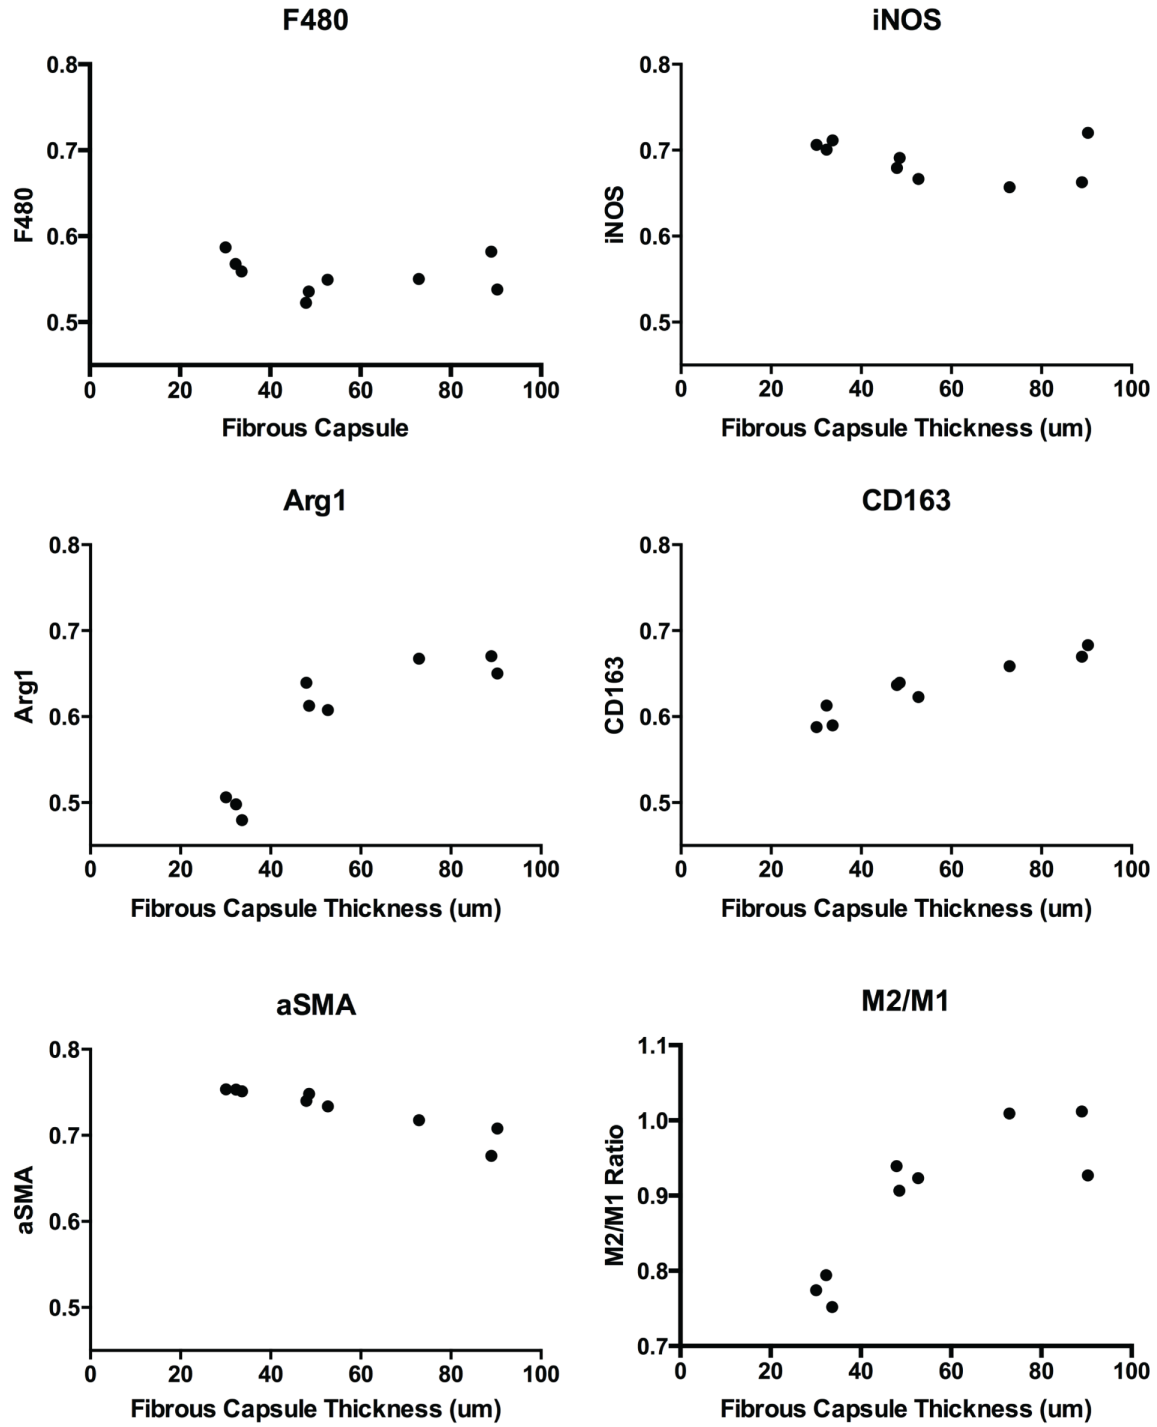

**Figure S4: Correlation analyses showing relationships between macrophage phenotype or myofibroblast markers and the fibrous capsule thickness.**
